# Supplementary material
Source: PubMed Central journal article supplement (PMC7283001)
Supplement: NIHMS1587115-supplement-Konttinen_et_al__supplement.pdf [file NIHMS1587115-supplement-Konttinen_et_al__supplement.pdf]

**Online-only supplemental data content**

Table 1. International Classification of Diseases (ICD) codes used to identify patients with health-care visits for non-fatal self-harm, substance abuse and mental disorders

Table 2. Self-administered questionnaires used to assess eating behaviors and health-related quality of life (HRQL)

Table 3. Baseline descriptive characteristics by non-fatal self-harm/suicide status during the follow up in the Swedish Obese Subjects study

Table 4. Results from univariate competing risk regression models predicting the risk of non-fatal self-harm and suicide in the Swedish Obese Subjects study

Figure 1. Forest plots for non-fatal self-harm and suicide in the Swedish Obese Subjects study by sociodemographic factors, health status and lifestyle behaviors

Figure 2. Forest plots for non-fatal self-harm and suicide in the Swedish Obese Subjects study by health-related quality of life and history of psychiatric disorder

Figure 3. Calibration plot of the risk score model and the derived score points in the surgery group of the Swedish Obese Subjects study

References

**Table 1. International Classification of Diseases (ICD) codes used to identify patients with health-care visits for non-fatal self-harm, substance abuse and mental disorders**

| <b>Condition</b>            | <b>ICD-8</b>                                | <b>ICD-9</b>                                                                          | <b>ICD-10</b>                                                                                     |
|-----------------------------|---------------------------------------------|---------------------------------------------------------------------------------------|---------------------------------------------------------------------------------------------------|
| Attempted suicide/self-harm | E950-959, E980-989                          | E950-959, E980-989                                                                    | X60-84, Y10-34, Y870                                                                              |
| Substance abuse             | 291; 394.3; 303-304;<br>970.00; 971; 989.99 | 291-292, 303-304, 305A,<br>305B, 305X, 357F, 425F,<br>535D, 571A, 571B, 571C,<br>571D | F10-F19, G621, I426,<br>G721, K292, K700-K704,<br>K709, K852, K860, G312,<br>Z714-Z715, Z721-Z722 |
| Mental disorders            | 290-315                                     | 290-319                                                                               | Chapter F                                                                                         |

**Table 2. Self-administered questionnaires used to assess eating behaviors and health-related quality of life (HRQL)**

|                                                                            | <b>Questionnaire</b>                                                        | <b>Items and response scale</b>                                                                                                                                                                                                                                | <b>Scoring</b>                                                                                                                                                                     | <b>Interpretation</b>                                                      |
|----------------------------------------------------------------------------|-----------------------------------------------------------------------------|----------------------------------------------------------------------------------------------------------------------------------------------------------------------------------------------------------------------------------------------------------------|------------------------------------------------------------------------------------------------------------------------------------------------------------------------------------|----------------------------------------------------------------------------|
| <b>Eating behavior</b>                                                     |                                                                             |                                                                                                                                                                                                                                                                |                                                                                                                                                                                    |                                                                            |
| Cognitive restraint of eating, disinhibition, and susceptibility to hunger | The Three-Factor Eating Questionnaire <sup>a</sup>                          | 21 cognitive restraint items, 16 disinhibition items, and 14 hunger items. The scale contains 36 items with a yes/no response format, 14 items on a 4-point response scale, and a vertical rating scale from 0 to 10.                                          | All item responses were dichotomized and summed up into separate cognitive restraint (score range: 0–21), disinhibition (score range: 0–16), and hunger (score range: 0–14) scores | Higher scores indicate more cognitive restraint, disinhibition, and hunger |
| <b>Physical HRQL</b>                                                       |                                                                             |                                                                                                                                                                                                                                                                |                                                                                                                                                                                    |                                                                            |
| Perceived health status                                                    | The Current Health scale of the General Health Rating Index <sup>b</sup>    | 9 items on a 4-point response scale with two acceptance and two rejection alternatives. E.g. “My health is excellent.”, “I have been feeling bad lately.”                                                                                                      | The items were summed up into a total score. Score range: 0–100                                                                                                                    | Higher scores indicate better perceived health status                      |
| <b>Mental HRQL</b>                                                         |                                                                             |                                                                                                                                                                                                                                                                |                                                                                                                                                                                    |                                                                            |
| Overall mood                                                               | The short version of the Mood Adjective Check List <sup>c</sup>             | 38 adjectives on a 4-point response scale with two acceptance and two rejection alternatives. The scale measures three major bipolar dimensions of mood: pleasantness/unpleasantness, activation/deactivation, and calmness/tension.                           | Mean score of all items was calculated to describe overall mood. Score range: 1–4                                                                                                  | Higher scores indicate more positive mood states.                          |
| Depression and anxiety                                                     | The Hospital Anxiety and Depression Scale <sup>d</sup>                      | 7 depression items and 7 anxiety items on a 4-point response scale.                                                                                                                                                                                            | The items were summed up into three scores: anxiety and depression scores (range 0–21), total score (range: 0–42).                                                                 | Higher scores indicate more symptoms.                                      |
| <b>Social HRQL</b>                                                         |                                                                             |                                                                                                                                                                                                                                                                |                                                                                                                                                                                    |                                                                            |
| Health-related limitations in social life                                  | The Social Interaction category of the Sickness Impact Profile <sup>e</sup> | 20 items on quality and quantity of social interaction within the family, among friends and in the community.                                                                                                                                                  | Scores represent the weighted sum of the endorsed items. Score range: 0–100                                                                                                        | Higher scores indicate more dysfunction in social interaction.             |
| Impact of obesity on psychosocial functioning                              | The Obesity-related Problems scale <sup>f</sup>                             | 8 items on a 4-point response scale. Respondents are asked to indicate how bothered they are by their obesity in a broad range of social activities (e.g. private gatherings at home, going to restaurants, trying on and buying clothes, intimate relations). | Responses were aggregated to a total score. Score range: 0–100                                                                                                                     | Higher scores indicate more impairment in psychosocial functioning.        |

**Table 3. Baseline descriptive characteristics by non-fatal self-harm/suicide status during the follow up in the Swedish Obese Subjects study**

| Variable                                   | No self-harm/suicide event (N=3890) |        | Self-harm/suicide event (N=157) |        |
|--------------------------------------------|-------------------------------------|--------|---------------------------------|--------|
|                                            | Mean / %                            | SD / N | Mean / %                        | SD / N |
| <b>Treatment group</b>                     |                                     |        |                                 |        |
| Control (%)                                | 51.0                                | 1984   | 35.7                            | 56     |
| Surgery (%)                                | 49.0                                | 1906   | 64.3                            | 101    |
| <b>Sociodemographics</b>                   |                                     |        |                                 |        |
| Age (years)                                | 47.9                                | 6.1    | 47.8                            | 6.3    |
| Men (%)                                    | 28.9                                | 1123   | 36.3                            | 57     |
| Married or partner (%)                     | 74.3                                | 2877   | 70.1                            | 110    |
| Education                                  |                                     |        |                                 |        |
| Basic (%)                                  | 64.7                                | 2517   | 62.4                            | 98     |
| Upper secondary (%)                        | 18.1                                | 706    | 24.2                            | 38     |
| University (%)                             | 17.1                                | 667    | 13.4                            | 21     |
| <b>Health status</b>                       |                                     |        |                                 |        |
| Diabetes (%)                               | 15.1                                | 586    | 13.5                            | 21     |
| BMI (kg/m <sup>2</sup> )                   | 41.3                                | 4.8    | 40.9                            | 4.1    |
| Joint pain (%)                             | 61.0                                | 2373   | 75.8                            | 119    |
| <b>History of psychiatric disorder</b>     |                                     |        |                                 |        |
| Self-harm (%)                              | 2.1                                 | 83     | 15.3                            | 24     |
| Substance abuse (%)                        | 2.3                                 | 90     | 11.5                            | 18     |
| Mental disorder (%)                        | 8.1                                 | 317    | 36.3                            | 57     |
| Psychiatric drug use (%)                   | 10.6                                | 411    | 33.8                            | 53     |
| <b>Lifestyle behaviors</b>                 |                                     |        |                                 |        |
| Daily smokers (%)                          | 22.7                                | 881    | 37.6                            | 59     |
| Alcohol intake (g/day)                     | 5.2                                 | 7.6    | 7.0                             | 9.9    |
| Sleep difficulties (awake in bed/night, h) | 1.0                                 | 0.9    | 1.6                             | 1.3    |
| Cognitive restraint (TFEQ) <sup>a</sup>    | 9.3                                 | 4.6    | 8.5                             | 4.5    |
| Disinhibition (TFEQ) <sup>a</sup>          | 9.1                                 | 3.6    | 9.5                             | 3.4    |
| Hunger (TFEQ) <sup>a</sup>                 | 6.9                                 | 3.5    | 7.7                             | 3.6    |
| <b>Self-rated HRQL<sup>b</sup></b>         |                                     |        |                                 |        |
| Perceived health                           | 54.3                                | 25.3   | 42.5                            | 26.5   |
| Anxiety                                    | 5.6                                 | 4.5    | 8.0                             | 4.9    |
| Depression                                 | 4.6                                 | 3.6    | 6.1                             | 4.2    |
| Overall mood                               | 2.9                                 | 0.6    | 2.7                             | 0.7    |
| Obesity-related problems                   | 49.7                                | 28.1   | 58.4                            | 29.2   |
| Social interaction                         | 11.3                                | 12.9   | 17.7                            | 15.2   |

Abbreviations: HRQL, health-related quality of life; TFEQ, Three-Factor Eating Questionnaire.

<sup>a</sup>Higher scores represent more cognitive restraint (score range 0–21), disinhibition (score range 0–16), and hunger (score range 0–14).

<sup>b</sup>Perceived health: higher scores represent better perceived health (score range 0–100). Social interaction and obesity-related problems: higher scores represent more dysfunction (score range 0–100). Overall mood: higher scores represent more positive mood states (score range 1–4). Anxiety and depression: higher scores represent more symptoms (score range 0–21).

**Table 4. Results from univariate competing risk regression models predicting the risk of non-fatal self-harm and suicide in the Swedish Obese Subjects study**

| Risk factor                                |            | Control (N=2040) |              |         | Surgery (N=2007) |              |         |
|--------------------------------------------|------------|------------------|--------------|---------|------------------|--------------|---------|
|                                            |            | subHR            | [95% CI]     | p value | subHR            | [95% CI]     | p value |
| Age (years)                                |            | 1.00             | [0.96-1.05]  | 0.848   | 1.02             | [0.98-1.05]  | 0.385   |
| Sex                                        | Women      | 1.00             | [1.00-1.00]  | .       | 1.00             | [1.00-1.00]  | .       |
|                                            | Men        | 0.74             | [0.39-1.42]  | 0.371   | 1.60             | [1.06-2.39]  | 0.023   |
| Married or partner                         | No         | 1.00             | [1.00-1.00]  | .       | 1.00             | [1.00-1.00]  | .       |
|                                            | Yes        | 1.06             | [0.55-2.03]  | 0.864   | 0.72             | [0.47-1.09]  | 0.117   |
| Education                                  | Basic      | 1.00             | [1.00-1.00]  | .       | 1.00             | [1.00-1.00]  | .       |
|                                            | Middle     | 1.46             | [0.76-2.79]  | 0.253   | 1.25             | [0.76-2.06]  | 0.383   |
|                                            | University | 0.67             | [0.30-1.53]  | 0.346   | 1.13             | [0.62-2.05]  | 0.682   |
| Diabetes                                   | No         | 1.00             | [1.00-1.00]  | .       | 1.00             | [1.00-1.00]  | .       |
|                                            | Yes        | 0.91             | [0.39-2.13]  | 0.827   | 0.86             | [0.49-1.48]  | 0.582   |
| BMI (kg/m <sup>2</sup> )                   |            | 0.98             | [0.92-1.03]  | 0.363   | 0.95             | [0.91-0.99]  | 0.027   |
| Joint pain                                 | No         | 1.00             | [1.00-1.00]  | .       | 1.00             | [1.00-1.00]  | .       |
|                                            | Yes        | 2.88             | [1.48-5.63]  | 0.002   | 1.47             | [0.93-2.34]  | 0.099   |
| History of self-harm                       | No         | 1.00             | [1.00-1.00]  | .       | 1.00             | [1.00-1.00]  | .       |
|                                            | Yes        | 3.67             | [1.12-12.03] | 0.032   | 8.35             | [4.94-14.10] | <0.001  |
| History of substance abuse                 | No         | 1.00             | [1.00-1.00]  | .       | 1.00             | [1.00-1.00]  | .       |
|                                            | Yes        | 2.57             | [0.81-8.13]  | 0.108   | 6.00             | [3.28-10.98] | <0.001  |
| History of mental disorder                 | No         | 1.00             | [1.00-1.00]  | .       | 1.00             | [1.00-1.00]  | .       |
|                                            | Yes        | 5.73             | [3.19-10.29] | <0.001  | 6.24             | [4.14-9.41]  | <0.001  |
| Psychiatric drug use                       | No         | 1.00             | [1.00-1.00]  | .       | 1.00             | [1.00-1.00]  | .       |
|                                            | Yes        | 4.04             | [2.22-7.32]  | <0.001  | 4.48             | [2.96-6.77]  | <0.001  |
| Smoking                                    | No         | 1.00             | [1.00-1.00]  | .       | 1.00             | [1.00-1.00]  | .       |
|                                            | Yes        | 1.79             | [0.99-3.25]  | 0.055   | 1.98             | [1.32-2.96]  | 0.001   |
| Alcohol intake (g/day)                     |            | 1.02             | [0.99-1.05]  | 0.204   | 1.03             | [1.01-1.05]  | 0.008   |
| Sleep difficulties (awake in bed/night, h) |            | 1.81             | [1.50-2.17]  | <0.001  | 1.51             | [1.27-1.79]  | <0.001  |
| Cognitive restraint (TFEQ) <sup>a</sup>    |            | 0.97             | [0.91-1.03]  | 0.318   | 0.98             | [0.94-1.03]  | 0.481   |
| Disinhibition (TFEQ) <sup>a</sup>          |            | 1.00             | [0.92-1.08]  | 0.940   | 1.03             | [0.98-1.08]  | 0.214   |
| Hunger (TFEQ) <sup>a</sup>                 |            | 1.02             | [0.95-1.10]  | 0.522   | 1.08             | [1.02-1.15]  | 0.012   |
| Perceived health <sup>b</sup>              |            | 0.98             | [0.97-0.99]  | 0.001   | 0.99             | [0.98-0.99]  | 0.001   |
| Anxiety <sup>c</sup>                       |            | 1.09             | [1.03-1.15]  | 0.002   | 1.12             | [1.07-1.16]  | <0.001  |
| Depression <sup>c</sup>                    |            | 1.08             | [1.01-1.16]  | 0.024   | 1.11             | [1.06-1.17]  | <0.001  |
| Overall mood <sup>d</sup>                  |            | 0.53             | [0.34-0.84]  | 0.007   | 0.44             | [0.31-0.62]  | <0.001  |
| Obesity-related problems <sup>e</sup>      |            | 1.01             | [1.00-1.02]  | 0.131   | 1.01             | [1.00-1.02]  | 0.027   |
| Social interaction <sup>f</sup>            |            | 1.02             | [1.01-1.04]  | <0.001  | 1.03             | [1.02-1.04]  | <0.001  |

Abbreviations: subHR, sub-hazard ratio; CI, confidence interval; TFEQ, Three-Factor Eating Questionnaire.

<sup>a</sup>Higher scores represent more cognitive restraint (score range 0–21), disinhibition (score range 0–16), and hunger (score range 0–14).

<sup>b</sup>Perceived health: higher scores represent better perceived health (score range 0–100). Social interaction and obesity-related problems: higher scores represent more dysfunction (score range 0–100). Overall mood: higher scores represent more positive mood states (score range 1–4). Anxiety and depression: higher scores represent more symptoms (score range 0–21).

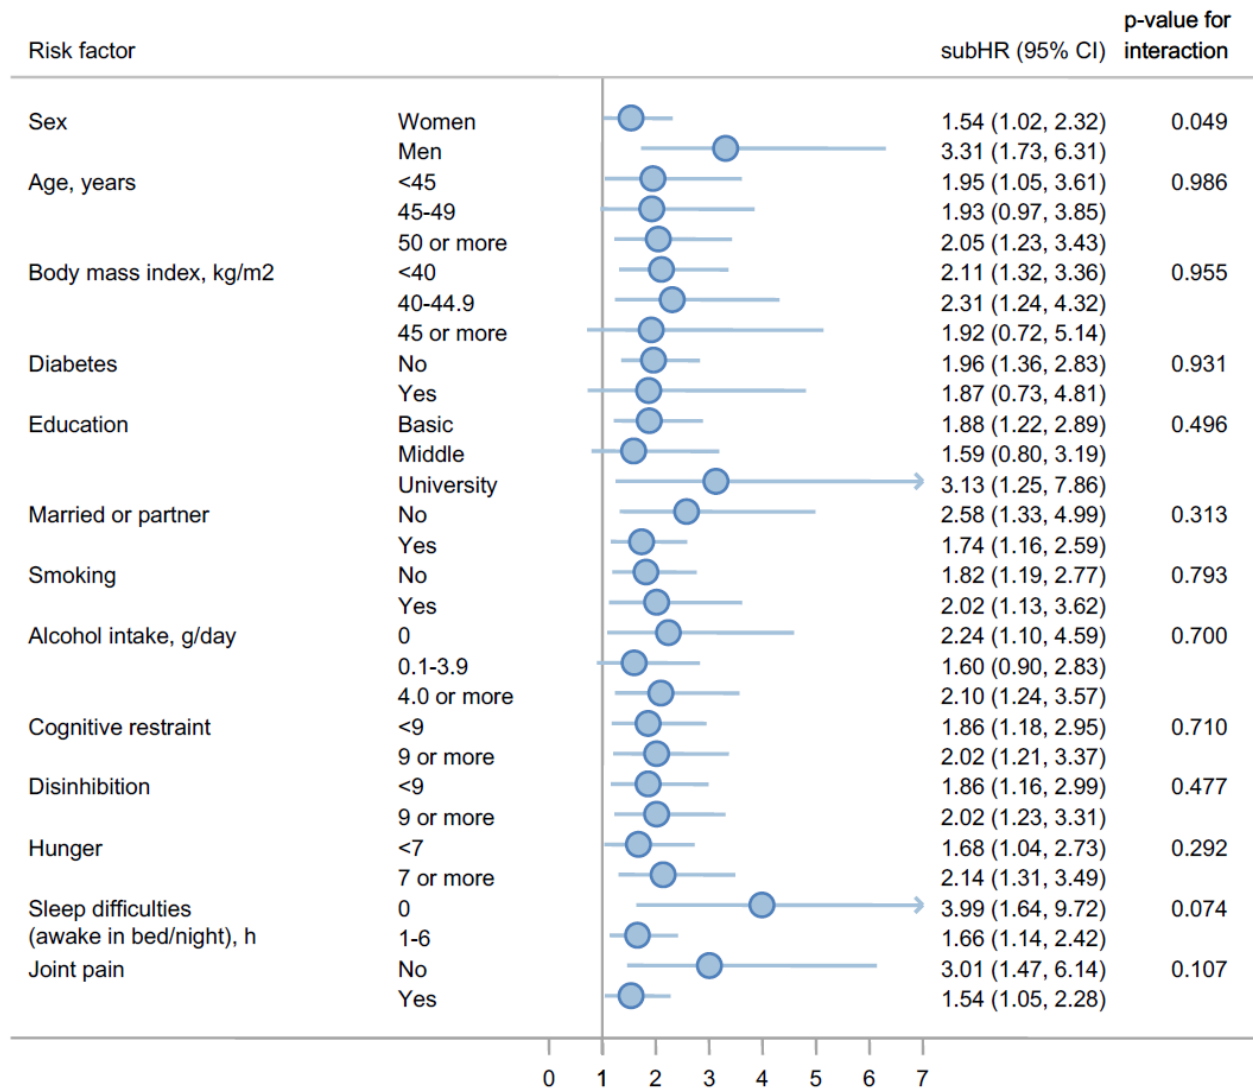

**Figure 1. Forest plots for non-fatal self-harm and suicide in the Swedish Obese Subjects study by sociodemographic factors, health status and lifestyle behaviors.** Cognitive restraint, disinhibition and hunger scores were dichotomized using the median as the cut-off score. Abbreviations: subHR, sub-hazard ratio; CI, confidence interval.

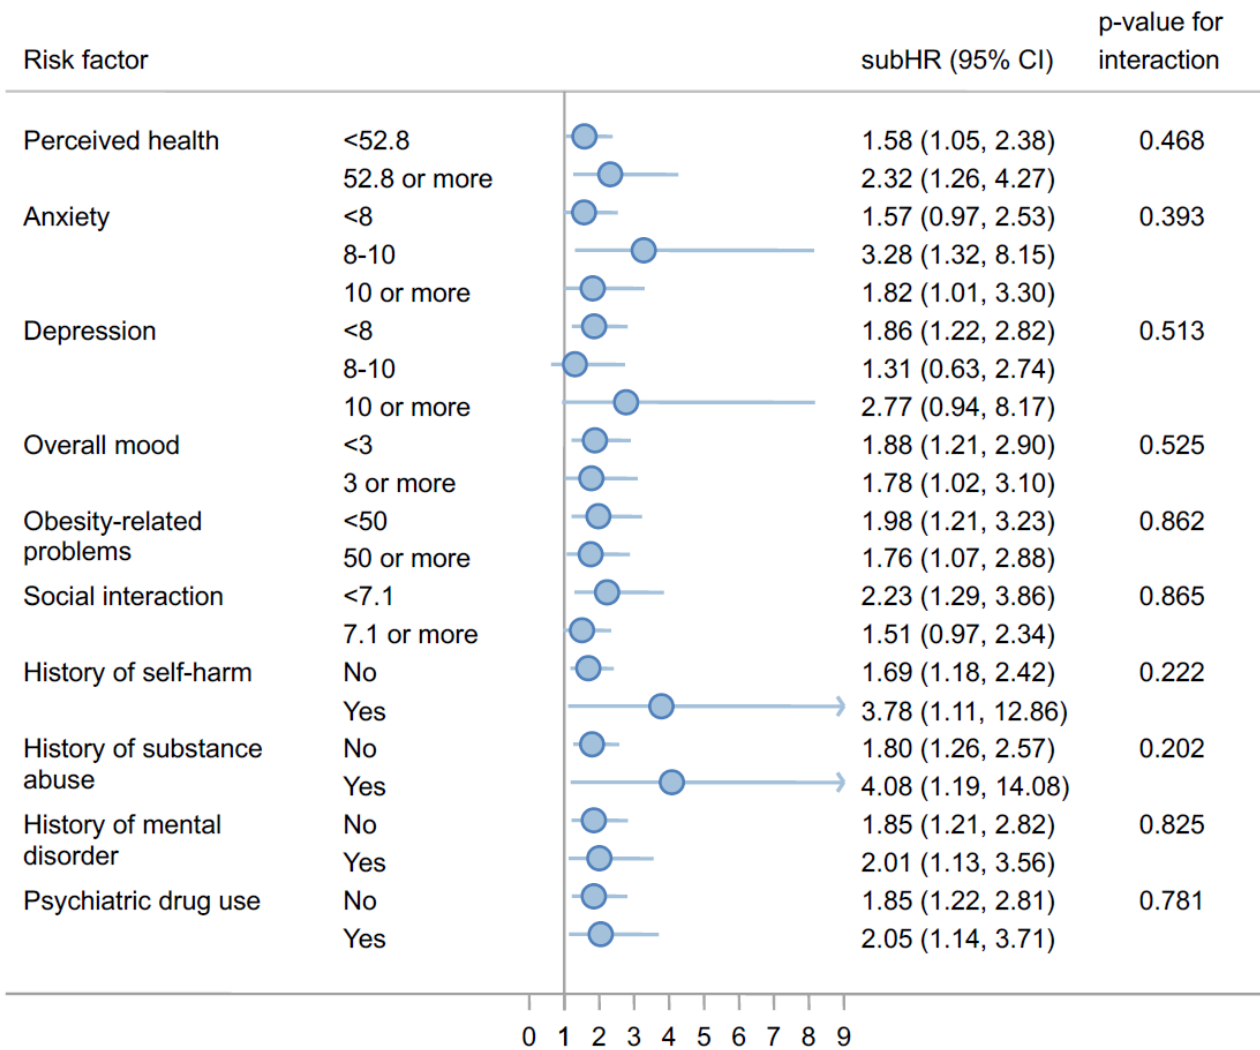

**Figure 2. Forest plots for non-fatal self-harm and suicide in the Swedish Obese Subjects study by health-related quality of life and history of psychiatric disorder.** Perceived health, overall mood, obesity-related problems and social interaction scores were dichotomized using the median as the cut-off score. Depression and anxiety scores were categorized as proposed by Zigmond and Snaith: scores < 8 = normal range, scores 8–10 = a possible case of mood disorder, and scores > 10 = a probable case of mood disorder. Abbreviations: subHR, sub-hazard ratio; CI, confidence interval.

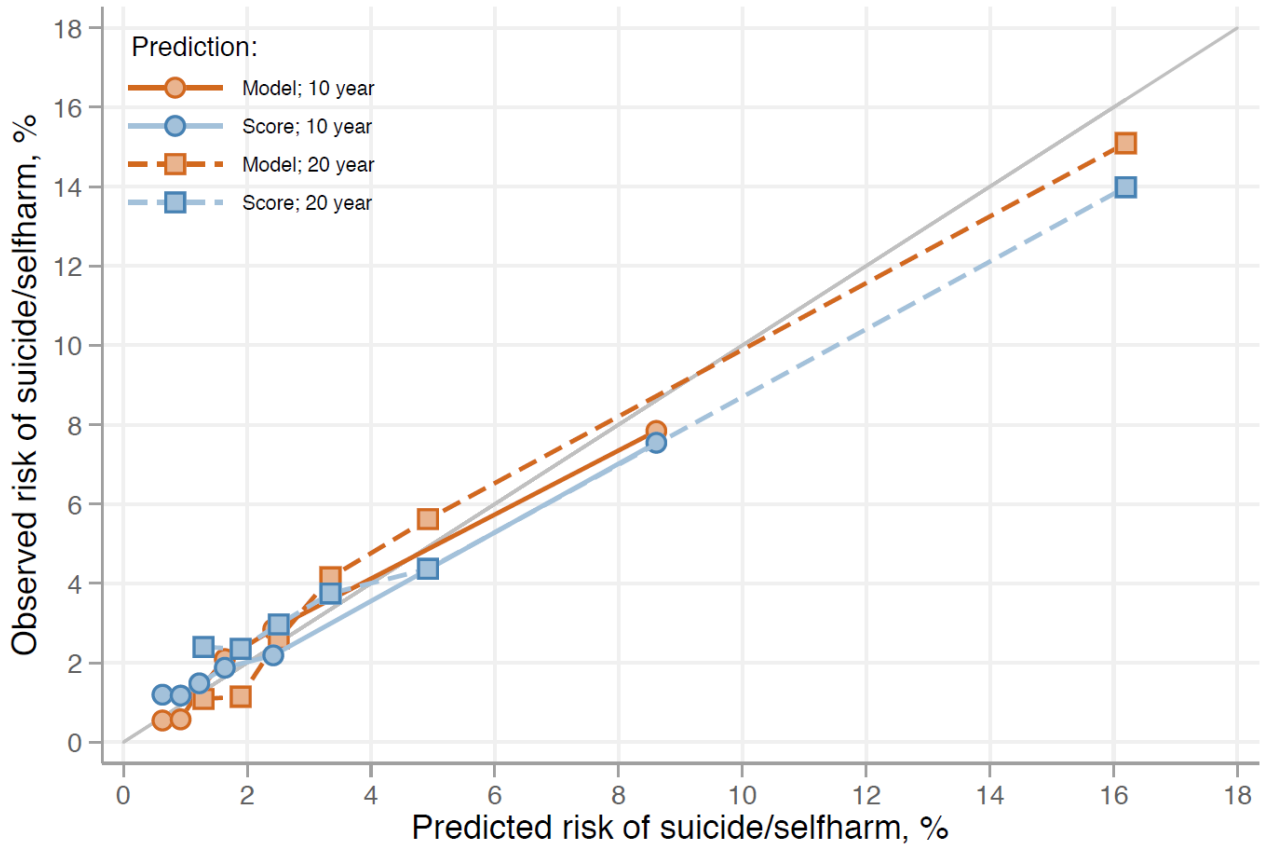

**Figure 3. Calibration plot of the risk score model and the derived score points in the surgery group of the Swedish Obese Subjects study. See Table 3 for more details on the score model and the score points.**



**References**

1. Stunkard AJ, Messick S. The three-factor eating questionnaire to measure dietary restraint, disinhibition and hunger. *J Psychosom Res* 1985;29:71-83.
2. Davies AR, Sherbourne CR, Peterson JR, et al. Scoring Manual: Adult Health Status and Patient Satisfaction Measures Used in RAND's Health Insurance Experiment. Santa Monica, CA: RAND Corporation; 1988.
3. Sjoberg L, Svensson E, Persson LO. The measurement of mood. *Scand J Psychol* 1979;20:1-18.
4. Zigmond AS, Snaith RP. The hospital anxiety and depression scale. *Acta Psychiatr Scand* 1983;67:361-370.
5. Bergner M, Bobitt RA, Carter WB, et al. The sickness impact profile: development and final revision of a health status measure. *Med Care* 1981;19:787-805.
6. Karlsson J, Taft C, Sjostrom L, et al. Psychosocial functioning in the obese before and after weight reduction: construct validity and responsiveness of the Obesity-related Problems scale. *Int J Obes Relat Metab Disord* 2003;27:617-630.
